# Supplementary material for: Clinical Evaluation of a Multiplex PCR for the Detection of Salmonella enterica Serovars Typhi and Paratyphi A from Blood Specimens in a High-Endemic Setting
Source: PubMed Central journal article supplement (PMC6726943; doi:10.4269/ajtmh.18-0992), 2019-07-08
Supplement: tpmd180992.SD1.pdf [file tpmd180992.SD1.pdf]

1 Supplementary Table 1: Specificity results of multiplex real-time PCR assay

| <b>S. enterica subsp. enterica serovar (Source)</b>                                       | No. of Strains Tested | S. Typhi multiplex qPCR | S. Paratyphi A multiplex qPCR | S. spp multiplex qPCR |
|-------------------------------------------------------------------------------------------|-----------------------|-------------------------|-------------------------------|-----------------------|
| Multiple <i>Salmonella</i> Typhi strains and clinical isolates (FNRC-ESS; WHO-SALM)       | 90                    | +                       | -                             | +                     |
| Multiple <i>Salmonella</i> Paratyphi A strains and clinical isolates (FNRC-ESS; WHO-SALM) | 33                    | - (+)                   | +                             | +                     |
| Blegdam (WHO-SALM)                                                                        | 1                     | -                       | -                             | +                     |
| Blockley (WHO-SALM)                                                                       | 1                     | -                       | -                             | +                     |
| Canada (WHO-SALM)                                                                         | 1                     | -                       | -                             | +                     |
| Choleraesuis var. Decatur (WHO-SALM)                                                      | 1                     | -                       | -                             | +                     |
| Dublin (WHO-SALM)*                                                                        | 1                     | - (+)                   | -                             | +                     |
| Emek (WHO-SALM)                                                                           | 1                     | -                       | -                             | +                     |
| Enteritidis (WHO-SALM)*                                                                   | 1                     | - (+)                   | -                             | +                     |
| Indiana (WHO-SALM)                                                                        | 1                     | -                       | -                             | +                     |
| Manhattan (WHO-SALM)                                                                      | 1                     | -                       | -                             | +                     |
| Mbandaka (WHO-SALM)                                                                       | 1                     | -                       | -                             | +                     |
| Mikawasima (WHO-SALM)                                                                     | 1                     | -                       | -                             | +                     |
| Muenchen (WHO-SALM)                                                                       | 1                     | -                       | -                             | +                     |
| Nitra (WHO-SALM)                                                                          | 1                     | -                       | -                             | +                     |
| Paratyphi B (WHO-SALM)                                                                    | 2                     | -                       | -                             | +                     |
| Paratyphi C (WHO-SALM)                                                                    | 1                     | -                       | -                             | +                     |
| Typhimurium (WHO-SALM)                                                                    | 1                     | -                       | -                             | +                     |
| <b>Others species</b>                                                                     |                       |                         |                               |                       |
| <i>Enterobacter cloacae</i> sbsp. <i>Cloacae</i> (CIP)                                    | 1                     | -                       | -                             | -                     |
| <i>Escherichia coli</i> (FNRC-ESS)*                                                       | 3                     | -                       | -                             | - (+)                 |
| <i>Escherichia vulneris</i> (CIP)                                                         | 1                     | -                       | -                             | -                     |
| <i>Neisseria meningitidis</i> (FNRC-Neisseria)                                            | 1                     | -                       | -                             | -                     |
| <i>Serratia marcescens</i> (CIP)                                                          | 1                     | -                       | -                             | -                     |
| <i>Shigella dysenteriae</i> (FNRC-ESS; CIP)                                               | 2                     | -                       | -                             | -                     |
| <i>Shigella flexneri 2a</i> (FNRC-ESS)                                                    | 1                     | -                       | -                             | -                     |
| <i>Staphylococcus aureus</i> (CIP)                                                        | 1                     | -                       | -                             | -                     |
| <i>Staphylococcus epidermidis</i> (CIP)                                                   | 1                     | -                       | -                             | -                     |
| <i>Streptococcus agalactiae</i> (CIP)                                                     | 1                     | -                       | -                             | -                     |
| <i>Streptococcus pneumoniae</i> (CIP)                                                     | 1                     | -                       | -                             | -                     |
| <i>Streptococcus pyogenes</i> (CIP)                                                       | 1                     | -                       | -                             | -                     |
| <i>Budvicia aquatica</i> (CIP)                                                            | 1                     | -                       | -                             | -                     |
| <i>Citrobacter freundii</i> (CIP)                                                         | 1                     | -                       | -                             | -                     |
| <i>Citrobacter gillenii</i> (CIP)                                                         | 1                     | -                       | -                             | -                     |
| <i>Citrobacter koseri</i> (CIP)                                                           | 1                     | -                       | -                             | -                     |
| <i>Citrobacter youngae</i> (CIP)                                                          | 1                     | -                       | -                             | -                     |
| <i>Enterobacter cloacae</i> sbsp. <i>dissolvens</i> (CIP)                                 | 1                     | -                       | -                             | -                     |
| <i>Enterobacter sakasaki</i> (CIP)*                                                       | 1                     | -                       | -                             | - (+)                 |
| <i>Escherichia albertii</i> (CIP)                                                         | 1                     | -                       | -                             | -                     |
| <i>Escherichia hermanii</i> (CIP)                                                         | 1                     | -                       | -                             | -                     |
| <i>Ewingella americana</i> (CIP)                                                          | 1                     | -                       | -                             | -                     |
| <i>Hafnia alvei</i> (CIP)                                                                 | 1                     | -                       | -                             | -                     |
| <i>Klebsiella oxytoca</i> (CIP)                                                           | 1                     | -                       | -                             | -                     |

|                                                                          |   |   |   |       |
|--------------------------------------------------------------------------|---|---|---|-------|
| <i>Klebsiella pneumoniae</i> sbsp. <i>Pneumoniae</i> (CIP)               | 1 | - | - | -     |
| <i>Klebsiella pneumoniae</i> sbsp. <i>rhinoscleromatis</i> (CIP)         | 1 | - | - | -     |
| <i>Leclercia adercarboxycola</i> (CIP)                                   | 1 | - | - | -     |
| <i>Proteus mirabilis</i> (CIP)                                           | 1 | - | - | -     |
| <i>Plesiomonas shigelloides</i> (CIP)                                    | 1 | - | - | -     |
| <i>Pectobacterium atrosepticum</i> (CIP)                                 | 1 | - | - | -     |
| <i>Raoultella planticola</i> (CIP)                                       | 1 | - | - | -     |
| <i>Rahnella aquatilis</i> (CIP)                                          | 1 | - | - | -     |
| <i>Serratia fonticola</i> (CIP)                                          | 1 | - | - | -     |
| <i>Xenorhabdus japonica</i> (CIP)*                                       | 1 | - | - | - (+) |
| <i>Yersinia enterocolitica</i> sbsp. <i>enterocolitica</i> (CIP)         | 1 | - | - | -     |
| <i>Yersinia pseudotuberculosis</i> sbsp. <i>Pseudotuberculosis</i> (CIP) | 1 | - | - | -     |

2

3 FNRC-ESS, French National Reference Center for *Escherichia coli-Shigella-Salmonella*, Institut Pasteur;

4 WHO-Salm, World Health Organization collaborative center for reference and research on

5 *Salmonella*, Institut Pasteur; CIP= Collection de l'Institut Pasteur; FNRC-Neisseria=French National

6 Reference Center for *Neisseria*. (\*) = cross-detection observed for some strains at high DNA

7 concentration (negative when 10X/100X diluted) with Ct Value > 33.5.

8
