# Supplementary material for: Clinical Evaluation of a Multiplex PCR for the Detection of Salmonella enterica Serovars Typhi and Paratyphi A from Blood Specimens in a High-Endemic Setting
Source: PubMed Central journal article supplement (PMC6726943; doi:10.4269/ajtmh.18-0992), 2019-07-08
Supplement: tpmd180992.SD2.pdf [file tpmd180992.SD2.pdf]

1 Supplementary Table 2: Determination of Blood Culture performance.

**A)** Overall population | Comparator (True positive) = Multiplex PCR Assay

| <b>Blood Culture</b>         | <b>TP</b> | <b>FP</b> | <b>FN</b> | <b>TN</b> | <b>Se (%)</b> | <b>Spe (%)</b> | <b>LR+</b> | <b>LR-</b> | <b>DOR</b> | <b>PT+ (%)</b> | <b>PT- (%)</b> |
|------------------------------|-----------|-----------|-----------|-----------|---------------|----------------|------------|------------|------------|----------------|----------------|
| <i>All (n=680)</i>           | 91        | 7         | 45        | 537       | 66.9          | 98.7           | 52.0       | 0.34       | 155.1      | 93             | 8              |
| <i>≤ 17 years (n=549)</i>    | 81        | 4         | 36        | 428       | 69.2          | 99.1           | 74.8       | 0.31       | 240.8      | 95             | 8              |
| <i>&gt; 17 years (n=131)</i> | 10        | 3         | 9         | 109       | 52.6          | 97.3           | 19.6       | 0.49       | 40.4       | 77             | 8              |

2

**B)** Volume BC – Volume PCR ≥ -0.1mL | Comparator (True positive) = Multiplex PCR Assay

| <b>Blood Culture</b>        | <b>TP</b> | <b>FP</b> | <b>FN</b> | <b>TN</b> | <b>Se (%)</b> | <b>Spe (%)</b> | <b>LR+</b> | <b>LR-</b> | <b>DOR</b> | <b>PT+ (%)</b> | <b>PT- (%)</b> |
|-----------------------------|-----------|-----------|-----------|-----------|---------------|----------------|------------|------------|------------|----------------|----------------|
| <i>All (n=214)</i>          | 28        | 6         | 18        | 162       | 60.9          | 96.4           | 17.0       | 0.41       | 42.0       | 82             | 10             |
| <i>≤ 17 years (n=123)</i>   | 20        | 3         | 9         | 91        | 69.0          | 96.8           | 21.6       | 0.32       | 67.4       | 87             | 9              |
| <i>&gt; 17 years (n=91)</i> | 8         | 3         | 9         | 71        | 47.1          | 95.9           | 11.6       | 0.55       | 21.0       | 73             | 11             |

3

4

5 **Legend:** TP, True Positive; FP, False Positive; TN, True Negative; FN, False Negative; Se, sensitivity;  
 6 Spe, specificity; LR+, Positive Likelihood Ratio; LR-, Negative Likelihood Ratio; DOR, Diagnostic Odds  
 7 Ratio; PT+, Positive Post-test probability; PT-, Negative Post-test probability.

8 Supplementary Table 2 shows analysis of blood culture performance in suspected cases with  
 9 (A)/without (B) difference in volume (Volume BC – Volume PCR) ≥ -0.1mL. Performances in clinical  
 10 setting (confidence interval = 95%) were calculated with R3.4.4 software and epiR package.

11
